# Supplementary material
Source: PubMed Central journal article supplement (PMC5959032)
Supplement: NIHMS945002-supplement.pdf [file NIHMS945002-supplement.pdf]

## Bacterial community changes in an industrial algae production system

Fulbright et al.

### Supplemental Information

**Figure S1. Observed OTUs increase with system scale.** Rarefaction curve showing, on average, that there are increased OTUs at larger system scales than smaller ones. Small systems include volumes ranging from 5 mL – 4 L, plotted separately. Average observed OTUs for each system are listed in the sample legend. Error bars (plot) and ranges ( $\pm$ ) represent  $\pm 1$  standard deviation.

**Figure S2. Phylogenetic distance increases among communities in medium and large systems.** Rarefaction curve showing phylogenetic distance (PD) increases on average at larger system scales. Small systems include volumes ranging from 5 mL – 4 L, plotted separately. Average PD for each system is listed in the sample legend. Error bars (plot) and ranges ( $\pm$ ) represent  $\pm 1$  standard deviation.

**Table S1. Abundance of bacterial orders across *N. salina* growth systems.** Relative abundances of bacterial orders identified in *N. salina* growth systems are represented. Data are formatted as in Table 1. Ph, Phylum (for phylum abbreviations, see Table 1).

**Table S2. Bacteria predominant in medium *N. salina* cultivation systems.** The ten most abundant bacterial orders identified in medium growth systems are shown. Zero values represent relative abundances less than 0.05%. Ph, Phylum (for phylum abbreviations, see Table 1). Heat maps are formatted separately for each growth system as in Table 1.  $\Sigma$ , total abundance of these ten orders in each system.

**Table S3. Comparison of prevalent bacteria in two studies of *Nannochloropsis* cultivations.** Comparison of bacteria identified in the cultivations of *N. salina* reported here with those reported by Wang, et al. (2012) in cultivations of *N. oceanica* IMET1.

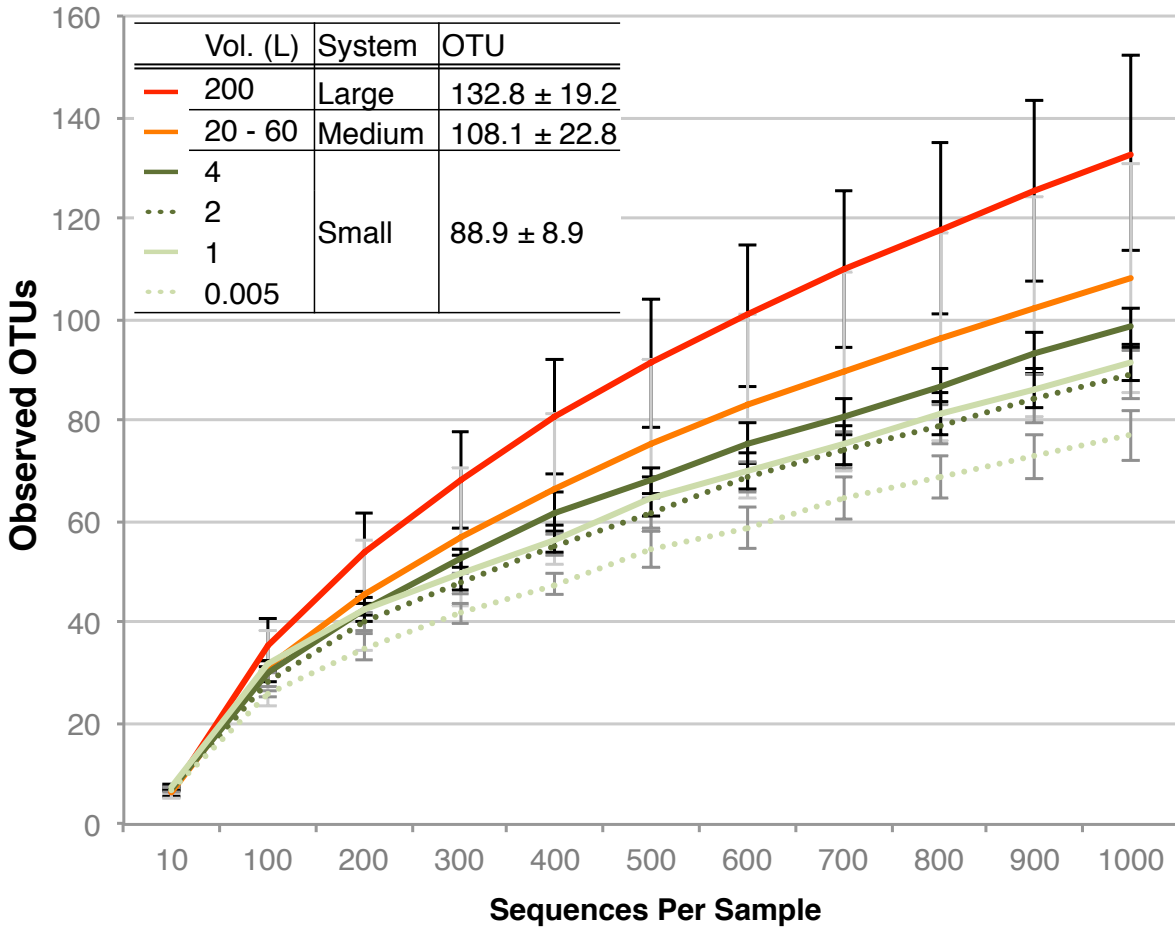

**Figure S1. Observed OTUs increase with system scale.** Rarefaction curve showing, on average, that there are increased OTUs at larger system scales than smaller ones. Small systems include volumes ranging from 5 mL – 4 L, plotted separately. Average observed OTUs for each system are listed in the sample legend. Error bars (plot) and ranges (±) represent ± 1 standard deviation.

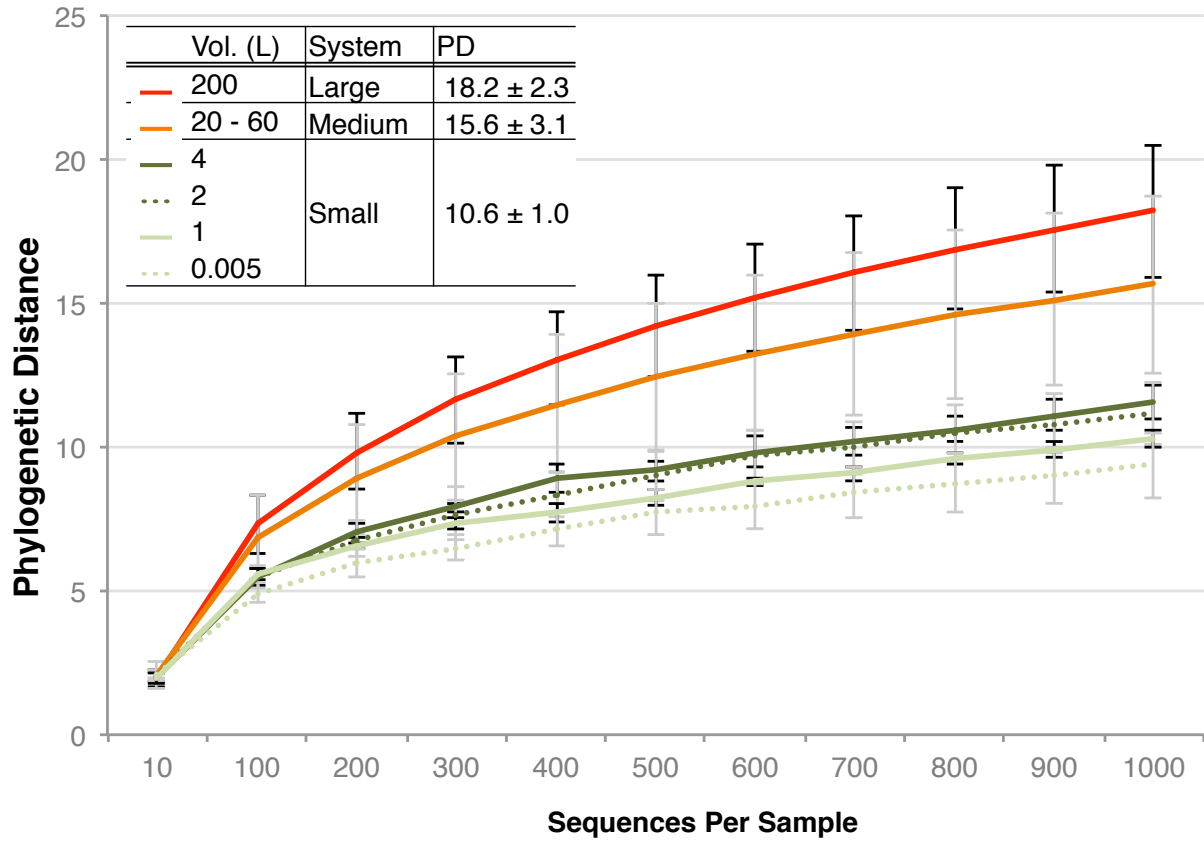

**Figure S2. Phylogenetic distance increases among communities in medium and large systems.** Rarefaction curve showing phylogenetic distance (PD) increases on average at larger system scales. Small systems include volumes ranging from 5 mL – 4 L, plotted separately. Average PD for each system is listed in the sample legend. Error bars (plot) and ranges ( $\pm$ ) represent  $\pm 1$  standard deviation.

| Ph            | Class                 | Order              | Abundance           |       |      |       |
|---------------|-----------------------|--------------------|---------------------|-------|------|-------|
|               |                       |                    | Sml                 | Med   | Lrg  |       |
| B             | Bacteroidia           | Bacteroidales      | 0.0                 | 0.0   | 0.1  |       |
|               | Cytophagia            | Cytophagales       | 5.0                 | 18.9  | 22.3 |       |
|               | Flavobacteria         | Flavobacteriales   | 20.1                | 4.6   | 3.4  |       |
|               | Sphingobacteria       | Sphingobacteriales | 0.0                 | 5.6   | 3.0  |       |
|               | [Rhodothermi]         | [Rhodothermales]   | 0.0                 | 0.2   | 0.1  |       |
|               | [Saprospirae]         | [Saprospirales]    | 23.2                | 32.0  | 37.3 |       |
| Pr            | Alphaproteobacteria   |                    | 0.1                 | 0.4   | 0.2  |       |
|               |                       | BD7-3              | 0.0                 | 1.8   | 1.5  |       |
|               |                       | Caulobacterales    | 0.0                 | 0.1   | 0.1  |       |
|               |                       | Kiloniellales      | 0.0                 | 1.1   | 7.1  |       |
|               |                       | Rhizobiales        | 19.7                | 8.0   | 6.2  |       |
|               |                       | Rhodobacteriales   | 8.7                 | 3.6   | 2.9  |       |
|               |                       | Rhodospirillales   | 1.1                 | 1.3   | 2.0  |       |
|               |                       | Rickettsiales      | 0.0                 | 0.2   | 0.3  |       |
|               | Sphingomonadales      | 5.5                | 2.1                 | 1.4   |      |       |
|               | Betaproteobacteria    | Burkholderiales    | 0.0                 | 0.0   | 0.1  |       |
|               |                       | Rhodocyclales      | 0.0                 | 1.3   | 0.3  |       |
|               | Deltaproteobacteria   | Desulfovibrionales | 0.0                 | 0.0   | 0.4  |       |
|               |                       | Myxococcales       | 0.0                 | 0.0   | 0.2  |       |
|               | Epsilonproteobacteria | Spirobacillales    | 0.0                 | 5.0   | 1.5  |       |
|               |                       | Campylobacterales  | 0.0                 | 0.0   | 0.1  |       |
|               | Gammaproteobacteria   | Alteromonadales    | 6.9                 | 2.2   | 1.0  |       |
|               |                       | Chromatiales       | 0.0                 | 0.2   | 0.1  |       |
|               |                       | Legionellales      | 0.0                 | 0.1   | 0.0  |       |
|               |                       | Oceanospirillales  | 1.6                 | 0.8   | 0.1  |       |
|               |                       | Vibrionales        | 0.0                 | 0.0   | 0.1  |       |
|               |                       | Pseudomonadales    | 0.0                 | 0.1   | 0.0  |       |
| Thiotrichales |                       | 0.0                | 0.1                 | 0.0   |      |       |
| Vibrionales   |                       | 0.0                | 0.0                 | 0.1   |      |       |
| Other         | 0.1                   | 0.0                | 0.0                 |       |      |       |
| A             | Solibacteres          | Solibacterales     | 0.0                 | 0.1   | 0.1  |       |
| Ac            | Acidimicrobiae        | Acidimicrobiales   | 0.2                 | 0.1   | 0.0  |       |
|               | Actinobacteria        | Actinomycetales    | 0.2                 | 0.1   | 0.0  |       |
| Ar            | [Fimbriimonadia]      | [Fimbriimonadales] | 0.0                 | 0.1   | 0.0  |       |
| Ch            | Anaerolineae          | SBR1031            | 0.0                 | 0.1   | 0.1  |       |
|               | 4C0d-2                | SM1D11             | 0.0                 | 0.2   | 0.0  |       |
| Cy            | ML635J-21             |                    | 2.8                 | 0.3   | 0.1  |       |
|               | Synechococophycideae  | Pseudanabaenales   | 0.0                 | 2.2   | 0.0  |       |
| F             | Clostridia            | Clostridiales      | 0.0                 | 0.0   | 0.2  |       |
| P             | Planctomycetia        | Pirellulales       | 1.4                 | 1.5   | 0.7  |       |
|               |                       | Planctomycetales   | 0.0                 | 0.3   | 0.1  |       |
| T             | SC3                   |                    | 0.0                 | 0.3   | 0.0  |       |
| V             | Opitutae              | Opitutales         | 1.1                 | 0.5   | 0.7  |       |
|               |                       | Puniceococcales    | 0.0                 | 0.1   | 0.2  |       |
|               | Verrucomicrobiae      | Verrucomicrobiales | 0.0                 | 0.3   | 1.2  |       |
| cd            | PRR-11 (BRC1)         |                    | 0.0                 | 0.0   | 0.1  |       |
|               | ZB2 (OD1)             |                    | 0.0                 | 0.2   | 0.2  |       |
| Unassigned    |                       |                    | 2.4                 | 3.4   | 4.4  |       |
|               |                       |                    | $\Sigma =$          | 100.1 | 99.5 | 100.0 |
|               |                       |                    | $\Sigma_{(B+Pr)} =$ | 92.0  | 89.7 | 91.9  |

**Table S1. Abundance of bacterial orders across *N. salina* growth systems.** Relative abundances of bacterial orders identified in *N. salina* growth systems are represented. Data are formatted as in Table 1. Ph, Phylum (for phylum abbreviations, see Table 1).

| Ph       | Class                 | Order              | Abundance |      |      |
|----------|-----------------------|--------------------|-----------|------|------|
|          |                       |                    | Sml       | Med  | Lrg  |
| B        | [Saprospirae]         | [Saprospirales]    | 23.2      | 32.0 | 37.3 |
| B        | Cytophagia            | Cytophagales       | 5.0       | 18.9 | 22.3 |
| Pr       | Alphaproteobacteria   | Rhizobiales        | 19.7      | 8.0  | 6.2  |
| B        | Sphingobacteria       | Sphingobacteriales | 0.0       | 5.6  | 3.0  |
| Pr       | Deltaproteobacteria   | Spirobacillales    | 0.0       | 5.0  | 1.5  |
| B        | Flavobacteria         | Flavobacteriales   | 20.1      | 4.6  | 3.4  |
| Pr       | Alphaproteobacteria   | Rhodobacterales    | 8.7       | 3.6  | 2.9  |
| Pr       | Gammaproteobacteria   | Alteromonadales    | 6.9       | 2.2  | 1.0  |
| C        | Synechococcophycideae | Pseudanabaenales   | 0.0       | 2.2  | 0.0  |
| Pr       | Alphaproteobacteria   | Sphingomonadales   | 5.5       | 2.1  | 1.4  |
| $\Sigma$ |                       |                    | 89.1      | 84.2 | 79.0 |

**Table S2. Bacteria predominant in medium *N. salina* cultivation systems.** The ten most abundant bacterial orders identified in medium growth systems are shown. Zero values represent relative abundances less than 0.05%. Ph, Phylum (for phylum abbreviations, see Table 1). Heat maps are formatted separately for each growth system as in Table 1.  $\Sigma$ , total abundance of these ten orders in each system.

| Bacteria isolated from <i>Nannochloropsis oceanica</i> IMET1 cultures* |             | Organism Taxonomy** / Relationship to OTUs identified in Industrial <i>N. salina</i> Cultivations** |           |      |      |      |                |                     |                   |                    |                |
|------------------------------------------------------------------------|-------------|-----------------------------------------------------------------------------------------------------|-----------|------|------|------|----------------|---------------------|-------------------|--------------------|----------------|
| Identify****                                                           | GenBank nt  | GenBank Source Organism                                                                             | Temp: Day | 15°C | 25°C | 30°C | Phylum         | Class               | Order             | Family             | Genus          |
| 98%                                                                    | EU073067.1  | Rhodococcus sp. TS1                                                                                 |           | 0    | 0    | 0    | Actinobacteria | Actinobacteria      | Corynebacteriales | Nocardiaceae       | Rhodococcus    |
| 99%                                                                    | EU440992.1  | Microbacterium schleiferi                                                                           |           | 0    | 0    | 0    | Actinobacteria | Actinobacteria      | Micrococcales     | Microbacteriaceae  | Microbacterium |
| 95%                                                                    | AB073576.2  | Cytophaga sp. MBI(C)04669                                                                           |           | 0    | 0    | 0    | Bacteroidetes  | Cytophaga           | Cytophagales      | Cytophagaceae      | Cytophaga      |
| 98%                                                                    | DQ080996.1  | Roseivirga spongicola                                                                               |           | 0    | 0    | 0    | Bacteroidetes  | Cytophaga           | Cytophagales      | Flammeovirgaceae   | Roseivirga     |
| 98%                                                                    | EU443204.1  | Jejulia pallidulitea                                                                                |           | 0    | 0    | 0    | Bacteroidetes  | Flavobacteria       | Flavobacteriales  | Flavobacteriaceae  | Jejulia        |
| 95%                                                                    | AB526333.1  | Maribacter sp. JAM-BA06                                                                             |           | 0    | 0    | 0    | Bacteroidetes  | Flavobacteria       | Flavobacteriales  | Flavobacteriaceae  | Maribacter     |
| 95%                                                                    | F-1229467.1 | Maribacter sp. KLE1063                                                                              |           | 0    | 0    | 0    | Bacteroidetes  | Flavobacteria       | Flavobacteriales  | Flavobacteriaceae  | Maribacter     |
| 100%                                                                   | HM355905.1  | Muricauda bealygonensis                                                                             |           | 0    | 0    | 0    | Bacteroidetes  | Flavobacteria       | Flavobacteriales  | Flavobacteriaceae  | Muricauda      |
| 98%                                                                    | AL231180.1  | Planctomycete str. 391                                                                              |           | 0    | 0    | 0    | Planctomycetes | Planctomycetia      | Planctomycetales  | Planctomycetaceae  |                |
| 99%                                                                    | AB257592.1  | Hoeflea sp. KF7                                                                                     |           | 0    | 0    | 0    | Proteobacteria | Alphaproteobacteria | Rhizobiales       | Phyllobacteriaceae | Hoeflea        |
| 99%                                                                    | AY332116.1  | Mesorhizobium sp. GWS-BW-H238                                                                       |           | 0    | 0    | 0    | Proteobacteria | Alphaproteobacteria | Rhizobiales       | Phyllobacteriaceae | Mesorhizobium  |
| 97%                                                                    | F-1230835.1 | Henriciella litoralis                                                                               |           | 0    | 0    | 0    | Proteobacteria | Alphaproteobacteria | Rhodobacteriales  | Hyphomonadaceae    | Henriciella    |
| 94%                                                                    | AB377216.1  | Hyphomonadaceae bacterium NAMAFO01                                                                  |           | 0    | 0    | 0    | Proteobacteria | Alphaproteobacteria | Rhodobacteriales  | Hyphomonadaceae    |                |
| 96%                                                                    | ALJ605746.2 | Roseibaca ekhomsensis                                                                               |           | 0    | 0    | 0    | Proteobacteria | Alphaproteobacteria | Rhodobacteriales  | Rhodobacteraceae   | Roseibaca      |
| 99%                                                                    | FJ866588.1  | Roseobacter sp. RAS3                                                                                |           | 0    | 0    | 0    | Proteobacteria | Alphaproteobacteria | Rhodobacteriales  | Rhodobacteraceae   | Roseobacter    |
| 99%                                                                    | AY332663.1  | Roseobacter sp. TM1042                                                                              |           | 0    | 0    | 0    | Proteobacteria | Alphaproteobacteria | Rhodobacteriales  | Rhodobacteraceae   | Roseobacter    |
| 99%                                                                    | AY682197.1  | Sulfitobacter sp. KMM 3457                                                                          |           | 0    | 0    | 0    | Proteobacteria | Alphaproteobacteria | Rhodobacteriales  | Rhodobacteraceae   | Sulfitobacter  |
| 96%                                                                    | GJ936120.1  | Thalassobacter sp. W-2-2                                                                            |           | 0    | 0    | 0    | Proteobacteria | Alphaproteobacteria | Rhodobacteriales  | Rhodobacteraceae   | Thalassobacter |
| 97%                                                                    | AB302370.1  | Tropicibacter naphthalenivorans                                                                     |           | 0    | 0    | 0    | Proteobacteria | Alphaproteobacteria | Rhodobacteriales  | Rhodobacteraceae   | Tropicibacter  |
| 98%                                                                    | EF512131.1  | Rhodobacteraceae bacterium CSQ-8                                                                    |           | 0    | 0    | 0    | Proteobacteria | Alphaproteobacteria | Rhodobacteriales  | Rhodobacteraceae   |                |
| 99%                                                                    | AB062106.1  | Porphyrobacter sanguineus                                                                           |           | 0    | 0    | 0    | Proteobacteria | Alphaproteobacteria | Sphingomonadales  | Erythrobacteraceae | Porphyrobacter |
| 99%                                                                    | DO412064.1  | Marinobacter sp. LOB-4                                                                              |           | 0    | 0    | 0    | Proteobacteria | Gammaproteobacteria | Alteromonadales   | Alteromonadaceae   | Marinobacter   |
| 98%                                                                    | DQ685041.1  | Halomonas sp. JL1044                                                                                |           | 0    | 0    | 0    | Proteobacteria | Gammaproteobacteria | Oceanospirillales | Halomonadaceae     | Halomonas      |
| 89%                                                                    | GC867230.1  | Pseudomonas sp. BRAZ6-1                                                                             |           | 0    | 0    | 0    | Proteobacteria | Gammaproteobacteria | Pseudomonadales   | Pseudomonadaceae   | Pseudomonas    |

\* Data adapted from Wang, et al. (2012) Supplemental Table S2. \*\*16S rRNA gene sequence identities of isolates from *N. oceanica* IMET1 culture\*, bacteria from *N. oceanica* cultures grown at 15°C, 25°C or 30°C were isolated on Marine Agar at Day 0 and Day 9. 16S rRNA genes were amplified, sequenced, and used to identify the closest cultured organism in the GenBank nucleotide database; heat map shows bacteria isolated from cultures maintained at the indicated temperature at Day 0 (light green) or Day 9 (dark green)

\*\* Taxonomy based on indicated GenBank Nucleotide Records

\*\*\* Highlighting indicates taxonomic classifications shared with OTUs identified in *N. salina* cultivations in the present study. For additional information, see "Color coding of bacterial types" key (below)

\*\*\*\* Percent identity of 16S rRNA gene sequences of bacteria isolated in Wang, et al. (2012) compared with respective "GenBank Source Organism." Identities  $\leq 97\%$  are shown in red.

Color coding of bacterial types:

- Isolated from *N. oceanica* cultures at Day 0\*
- Isolated from *N. oceanica* cultures at Day 9\*
- Associated with 90% of *N. salina* cultivations in this study
- Associated with 95% of *N. salina* cultivations in this study
- Other notable bacteria; see Comments

Comments

An OTU of the Family **Cytophagaceae** was associated with 95% of *N. salina* cultivations. A second OTU of the Order **Cytophagales** was associated with 90% of cultivations

Though **not** conserved in 90% or more of *N. salina* cultivations, members of the Order **Flavobacteriales** were, on average, the 2<sup>nd</sup> most abundant OTUs in Small cultivation systems (20.1%), the 5<sup>th</sup> most abundant in Large systems (3.4%), and the 6<sup>th</sup> most abundant in Medium systems (4.6%)

OTUs of the Order **Planctomycetales** averaged 0.3% and 0.1% relative abundance in Medium and Large systems, respectively

3 OTUs of the Order **Rhizobiales** were associated with 95% of *N. salina* cultivations, including the Family **Phyllobacteriaceae**, plus 2 OTUs of Family **Hyphomicrobiaceae**

2 OTUs of the Family **Hyphomonadaceae** were each associated with 90% of *N. salina* cultivations; there were 7 additional members of the Order **Rhodobacteriales** associated with *N. oceanica* IMET1

An OTU of the Family **Erythrobacteraceae** was associated with 90% of *N. salina* cultivations

An OTU of the Genus **Marinobacter** was associated with 90% of *N. salina* cultivations

OTUs of the Order **Oceanospirillales** were, on average, the 9<sup>th</sup> most abundant OTUs in Small cultivation systems (1.6%) and were also identified in Medium and Large systems

OTUs of the Order **Pseudomonadales** averaged 0.1% relative abundance in Medium systems

**Table S3. Comparison of prevalent bacteria in two studies of *Nannochloropsis* cultivations.** Comparison of bacteria identified in the cultivations of *N. salina* reported here with those reported by Wang, et al. (2012) in cultivations of *N. oceanica* IMET1.
